# Supplementary material
Source: MDPI journal article supplement (https://www.mdpi.com/2073-4441/15/18/3197)
Supplement: s1 [file s1 › water-2569164-supplementary.pdf]

# Bentonite Clay/CNT-based Nano adsorbent for textile wastewater treatment: Optimization of process parameters

Table S1. ANOVA for Response Surface 2F1 Model

| Source           | Sum of Squares | Df | Mean Square | F value | P-value  |                 |
|------------------|----------------|----|-------------|---------|----------|-----------------|
|                  |                |    |             |         | Prob > F |                 |
| Linear           | 234.60         | 11 | 21.33       | 3.24    | 0.1024   |                 |
| 2FI              | 102.20         | 8  | 12.77       | 1.94    | 0.2412   | Suggested       |
| Quadratic        | 83.33          | 5  | 16.67       | 2.53    | 0.1655   |                 |
| Cubic            | 0.29           | 1  | 0.29        | 0.043   | 0.8431   | Aliased         |
| Pure Errors      | 32.91          | 5  | 6.58        |         |          |                 |
| Model            | 2309.81        | 6  | 384.97      | 37.04   | < 0.0001 | Significant     |
| A-Adsorbent dose | 1560.86        | 1  | 1560.86     | 150.19  | < 0.0001 |                 |
| B-pH             | 21.03          | 1  | 21.03       | 2.02    | 0.1784   |                 |
| C-Time           | 595.52         | 1  | 595.52      | 57.30   | < 0.0001 |                 |
| AB               | 71.04          | 1  | 71.04       | 6.84    | 0.0214   |                 |
| AC               | 9.07           | 1  | 9.07        | 0.87    | 0.3672   | Not significant |
| BC               | 52.29          | 1  | 52.29       | 5.03    | 0.0430   |                 |
| Residual         | 135.11         | 13 | 10.39       |         |          |                 |
| Lack of Fit      | 102.20         | 8  | 12.77       | 1.94    | 0.2412   | Not significant |
| Pure Error       | 32.91          | 5  | 6.58        |         |          |                 |

The 2FI model is suggested for our data, and a cubic model is aliased.

### 1.1.1 Residual Plots for Response Yield

Figure 9(a) showed a linear plot of the normal probability (internally studentized residuals); when residual studentized was being compared to the residual variance, the data were normally distributed. Figure 9(b) showed that the actual or experimental data was in good agreement with predicted values; thus, the adequacy of the model (developed) was confirmed [33].

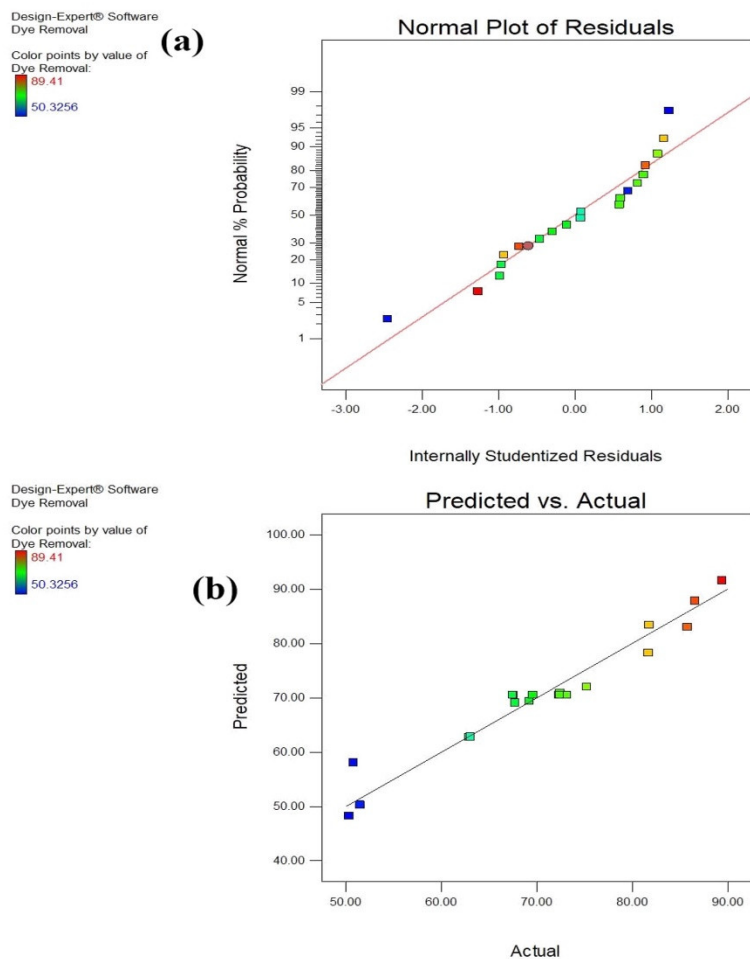

**Figure S1.** (a) Normal plots of residuals (b) Predicted vs. actual.

**Table S2.** Adsorption kinetics

| Linear kinetic study          |                  |          | Non-linear kinetic study |         |
|-------------------------------|------------------|----------|--------------------------|---------|
| Pseudo first order            | parameters       | Value    | Parameters               | value   |
|                               | $q_{ecal}$       | 9.115716 | $q_{ecal}$               | 536     |
|                               | $K_1$ (/min)     | 0.00053  | $K^2$                    | 0.00048 |
|                               | $R^2$            | 0.06411  | $R^2$                    | 1       |
| Chi-square                    | $X^2$            | 2658     | $X^2$                    | 0.22    |
| Pseudo second order           | $q_{ecal}$       | 564      | $q_{ecal}$               | 584     |
|                               | $K_2$ (g/mg/min) | 0.000931 | $K_2$                    | 0.1552  |
|                               | $R^2$            | 0.9965   | $R_2$                    | 0.9953  |
| Chi-square                    | $X^2$            | 0.34     | $X^2$                    | 1.90    |
| Intraparticle diffusion model | $K_{diff}$       | 31.77    | $K_{diff}$               | 31      |
|                               | $q_{ecal}$       | 576      | $q_{ecal}$               | 552     |
|                               | $R^2$            | 0.937    | $R^2$                    | 0.948   |
|                               | $X^2$            | 1.17     | $X^2$                    | 0.007   |
